## Two FGF-receptor homologues of *Drosophila*: one is expressed in mesodermal primordium in early embryos

Emiko Shishido, Shin-ichi Higashijima, Yasufumi Emori and Kaoru Saigo

Department of Biophysics and Biochemistry, Faculty of Science, University of Tokyo, 7-3-1 Hongo, Bunkyo-ku, Tokyo 113, Japan

### SUMMARY

The fibroblast growth factor (FGF)/receptor system is thought to mediate various developmental events in vertebrates. We examined molecular structures and expression of *DFR1* and *DFR2*, two *Drosophila* genes closely related to vertebrate FGF-receptor genes. *DFR1* and *DFR2* proteins contain two and five immunoglobulin-like domains, respectively, in the extracellular region, and a split tyrosine kinase domain in the intracellular region. In early embryos, *DFR1* RNA expression, requiring both *twist* and *snail* proteins, is specific to mesodermal primordium and invaginated mesodermal cells. At later stages, putative muscle pre-

cursor cells and cells in the central nervous system (CNS) express *DFR1*. *DFR2* expression occurs in endodermal precursor cells, CNS midline cells and certain ectodermal cells such as those of trachea and salivary duct. FGF-receptor homologues in *Drosophila* would thus appear essential for generation of mesodermal and endodermal layers, invaginations of various types of cells, and CNS formation.

Key words: fibroblast growth factor, *Drosophila melanogaster*, tyrosine kinase, immunoglobulin superfamily, mesoderm, central nervous system

### INTRODUCTION

Fibroblast growth factors (FGFs) constitute a growth factor family of at least seven members (Burgess and Maciag, 1989). In mammals, FGFs are not only capable of inducing cell proliferation and chemotaxis (Burgess and Maciag, 1989), but also are potent inducers of angiogenesis (formation of new blood vessel; Cross and Dexter, 1991). Response to FGFs is mediated by high-affinity cell-surface receptors (FGF-Rs) through activation of intracellular tyrosine kinase (Lee et al., 1989). FGF-Rs are widely distributed in various embryonic cells in mammals so that mammalian embryogenesis may require pleiotropic functions of FGFs (Wanaka et al., 1991).

The FGF/FGF-R signaling system has also been shown quite likely essential for mesoderm formation in *Xenopus* (Jessell and Melton, 1992; Whitman and Melton, 1992). Most, if not all, FGFs can mimic the mesoderm-inducing activity of vegetal pole cells in the early blastula and, hence, may possibly be natural inducers of mesoderm formation (Slack et al., 1987; Kimelman et al., 1988). An injection of mRNA encoding a dominant-negative form of FGF-R into embryos has been demonstrated to cause significant deformation in mesodermal structures of tadpoles (Amaya et al., 1991).

Molecular analysis of FGF-Rs in chicken, humans and *Xenopus* has indicated that FGF-Rs constitute a family of receptor-tyrosine kinases (Lee et al., 1989; Ruta et al., 1989; Seno et al., 1991; Friesel et al., 1991). Each FGF-R mole-

cule has more than two extracellular immunoglobulin-like domains (Ig-domains) as is also the case for receptors of the platelet-derived growth factor (PDGF) and colony stimulating factor-1 (CSF-1; Williams, 1988). However, unlike receptors for PDGF and CSF-1, receptors for FGFs possess in common additional characteristics such as a relatively long juxtamembrane region, kinase catalytic sequences split by a short stretch of amino acids and a short carboxyl terminal tail.

Understanding the physiological roles of the FGF/FGF-R signaling system may be facilitated by clarification of the roles of homologous genes in *Drosophila*, in which both genetic and developmental analyses are applicable. In a previous experiment (Shishido et al., 1991), we searched for genomic DNA fragments of *Drosophila*, encoding novel tyrosine kinases, by polymerase chain reaction (PCR). Two of the seven DNA fragments isolated (*dtk1* and *dtk2*) were found partly to encode polypeptides highly homologous in amino acid sequence to vertebrate FGF-Rs. Using a different approach, Glazer and Shilo (1991) independently identified a *Drosophila* FGF-R homologue (*DFGF-R*). Unlike our *dtk1* and *dtk2* products, the *D-FGFR* protein appeared to have a long substitution at or near subdomain VIII, a tyrosine kinase subdomain conserved in all tyrosine kinases so far examined (Hanks et al., 1988).

For clarification of the above and further extension of our analysis, complete nucleotide sequences of the coding regions of *dtk1* and *dtk2* genes were determined and their expression patterns in embryos were examined. *dtk1* and

*dtk2*, respectively, were found to be *Drosophila* FGF-R homologues having two and five Ig-domains. *dtk1* expression was specific to mesoderm in early embryos, while *dtk2*, seemingly corresponding to *DFGF-R*, was expressed in endodermal precursors.

## MATERIALS AND METHODS

### Fly strains

Canton-S (wild type) was obtained from Y. Hotta (University of Tokyo). Fly strains with *twi<sup>1D96</sup>*, *sna<sup>11G</sup>* were obtained from C. Nüsslein-Volhard (Max Plank Institute, Tübingen). Strain *Df(1)260-1/FM4* was obtained from UMEÅ Stock Center. *Df(1)260-1* is a mutation, in which the whole AS-C region is deficient (Gonzalez et al., 1989). Strain *sr16/TM1* (De La Pompa et al., 1989) and a *Dmyd-lacZ* transformant line, 14.1(II) (Paterson et al., 1991) were obtained from A. Ferrus (Instituto Cajal, Madrid) and W. J. Gehring (University of Basel), respectively.

### Molecular analyses

Genomic DNA and cDNA clones were isolated from our genomic DNA and pupal cDNA libraries, respectively (Kojima et al., 1991). Nucleotide sequences were determined as described previously (Emori et al., 1985). All other procedures for molecular analyses were essentially as described by Sambrook et al. (1989).

### In situ hybridization to whole embryos

Fixation and pretreatment of embryos were performed as described by Tautz and Pfeifle (1989). RNA probes were prepared as follows. cDNA inserts in cFR4-6 (*DFR1*), cFR5-1 (*DFR2*) and PCR-amplified *twist* genomic DNA (Thisse et al., 1988) were cloned into Bluescript plasmid vectors (Stratagene). Purified plasmid DNA was linearized by a suitable restriction enzyme and used as a template. Antisense RNA was prepared by in vitro transcription using digoxigenin-11-UTP (Boehringer Mannheim) and T7 or T3 RNA polymerase. The reaction was carried out according to the manufacturer's standard protocol. After fragmentation into an average size of 150 nucleotides by incubation at 60°C in a buffer containing 40 mM NaHCO<sub>3</sub>, 60 mM Na<sub>2</sub>CO<sub>3</sub>, and 50 mM DTT, RNA was used as a probe for hybridization.

Hybridization was carried out essentially as described by Yokouchi et al. (1991). Embryos were incubated overnight at 50°C in a solution containing 20 mM Tris-HCl (pH 8.0), 2.5 mM EDTA (pH 8.0), 1× Denhardt's solution (0.02% BSA, 0.02% Ficoll, 0.02% polyvinylpyrrolidone), 300 mM NaCl, 1 mg/ml *Escherichia coli* tRNA, 50% formamide, 10% dextran sulfate and 0.5 µg/ml of digoxigenin-labeled RNA probe. After hybridization, embryos were washed with 2× SSC containing 50% formamide for 1 hour at 50°C, followed by RNase treatment in 10 mM Tris-HCl (pH 8.0) with 500 mM NaCl and 20 µg/ml RNaseA for 30 minutes at room temperature. Then, embryos were washed again with 2× SSC containing 50% formamide for 1 hour at 50°C and then with 1× SSC in 50% formamide for 1 hour at 50°C. Immunological detection was carried out essentially as described by Tautz and Pfeifle (1989).

### The crosses

To examine *DFR1* expression in AS-C<sup>-</sup> embryos, crosses were made with *Df(1)260-1/+* females derived from *Df(1)260-1/FM4* and wild-type flies, and wild-type males. Consistent aberrations observed in one quarter of the embryos were noted as mutant phenotypes. P[*Dmyd-lacZ*]/+; *sr16/+* flies were obtained by crossing flies homozygous for the P insertion (on the second chromosome) and *sr16/TM1* flies. P[*Dmyd-lacZ*]/+; *sr16/+* flies were crossed to

each other and the resultant embryos (progeny) were stained with anti-β-galactosidase antibody as described (Higashijima et al., 1992). Consistent aberrations observed in one quarter of the *lacZ*-expressing embryos were noted as mutant phenotypes.

### Sectioning of embryos

After dehydration through an ethanol series, stained embryos were embedded in polyester wax (BHD, England), incubated at 37°C and sectioned at 10°C. Samples thus obtained were treated with 100% ethanol and mounted in Euparal (Chroma-gesellschaft, Germany).

## RESULTS

### Molecular cloning of two *Drosophila* FGF-R gene homologues

Using *dtk1* and *dtk2* fragments as probes, genomic DNA clones were isolated. cDNA clones were isolated using suitable genomic DNA probes. Since, as described below, polypeptides encoded by cDNA inserts are very similar in sequence and organization to vertebrate FGF-Rs, *dtk1* and *dtk2*, respectively, were renamed *DFR1* and *DFR2* (*Drosophila* FGF-receptor homologues 1 and 2). In situ hybridization to polytene chromosomes showed *DFR1* and *DFR2* to be mapped at 90D-E and 70C, respectively (data not shown).

### *DFR1* encodes a *Drosophila* FGF-receptor having two Ig-domains

The complete nucleotide sequence of the cDNA insert in cFR4-6 and its relevant genomic regions were determined (Fig. 1B). As schematically shown in Fig. 1A, the *DFR1* gene included no intron. The cFR4-6 insert contains a single long open reading frame (ORF) of 2251 bp, followed by 523 bp of the 3' non-coding sequence with a truncated poly(A) tail. The analysis of genomic sequences indicated the in-frame termination codon to be located at nucleotide positions -56 to -54 and no additional in-frame initiation codon to be present within the region from -1 to -53. Regions with the first and second ATG codons (nucleotide positions, 61-67 and 106-112, respectively) matched the *Drosophila* consensus sequence for the translational initiation (Cavener, 1987). However, only the second ATG codon may possibly be functional, since, as in the case of vertebrate FGF-R genes, it is directly followed by a nucleotide sequence coding for a hydrophobic stretch of 22 amino acids capable of serving as a signal peptide. The expected cleavage site of the putative signal peptide may be between Ala-19 and Val-20 (von Heijne, 1983). The second hydrophobic stretch was detected in the middle of the ORF (amino acid positions, 295-318), presumably representing the transmembrane domain. Thus, the extracellular and intracellular domains of the *DFR1* protein were assigned to amino acid residues 20-294 and 319-714, respectively.

As in the case of vertebrate FGF-Rs (Lee et al., 1989), the intracellular region contains a relatively long juxtamembrane domain (77 amino acids), split tyrosine kinase catalytic sequence (278 amino acids) and a short carboxyl terminal tail (41 amino acids). All 11 tyrosine kinase subdomains (I to XI; Hanks et al., 1988) were found to be conserved. The *DFR1* kinase insert (19 amino acids) is slightly

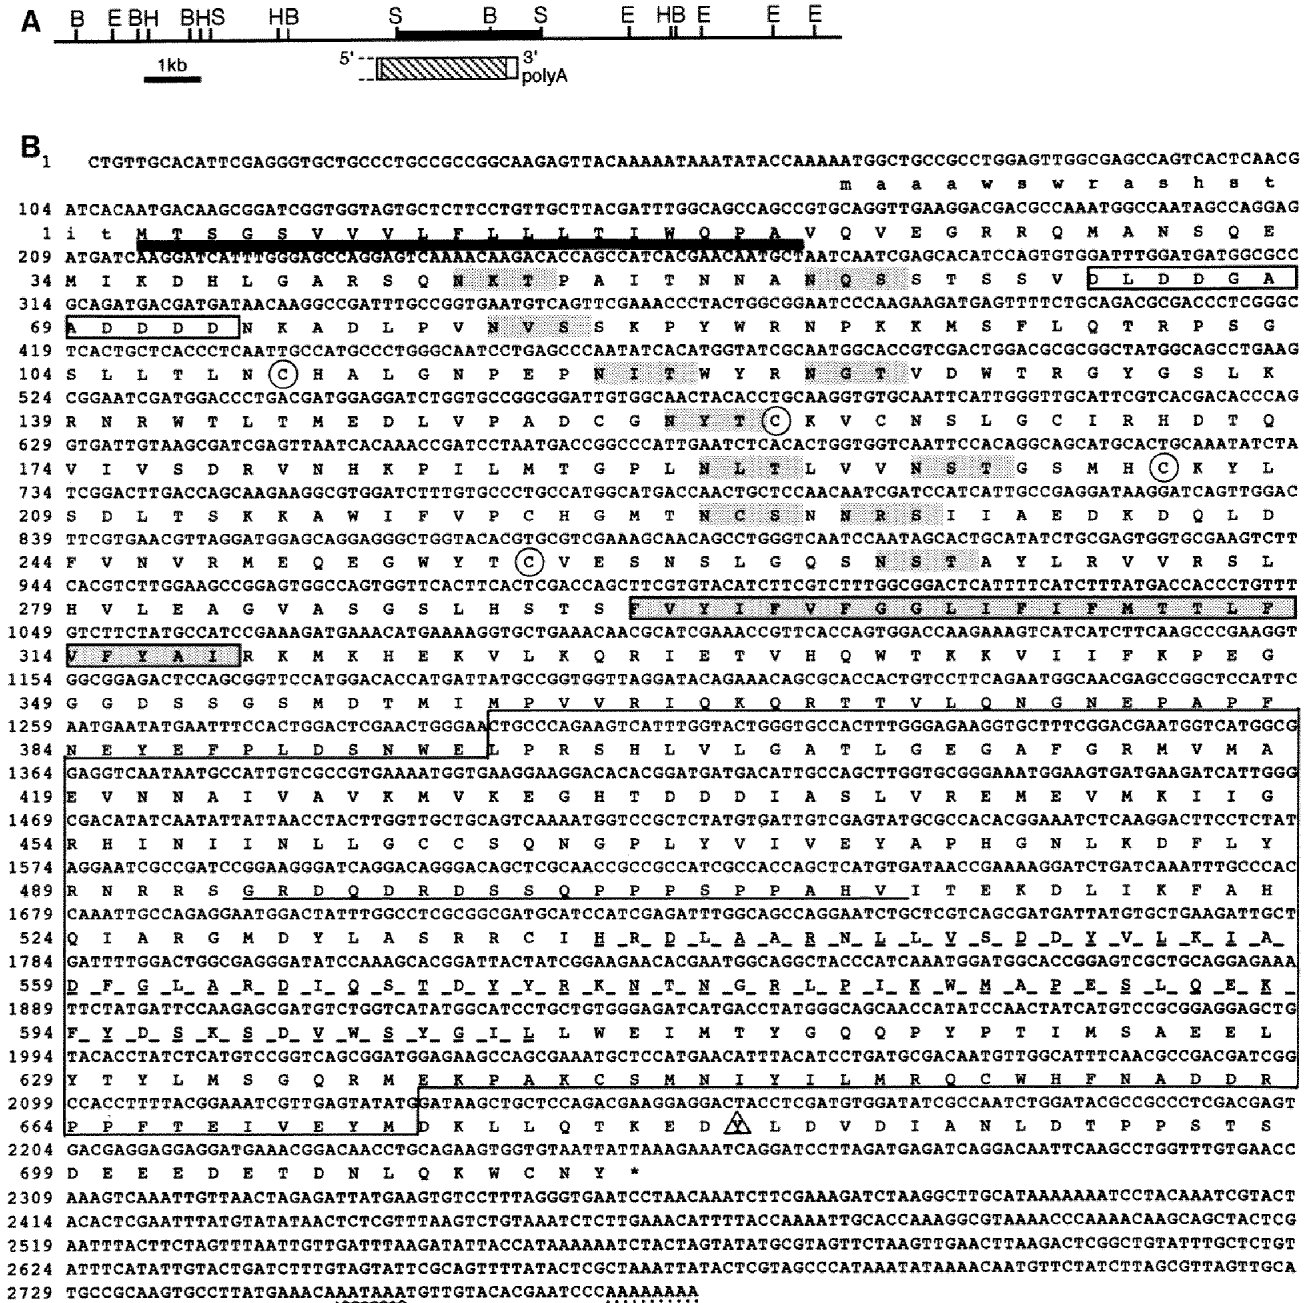

**Fig. 1.** (A) Restriction map of the *DFR1* genomic region and organization of the *DFR1* transcription unit. The *DFR1* exon is boxed. The hatched region represents a possible coding region. The solid bar shows the region used as a probe for cDNA screening. B, *Bam*HI; E, *Eco*RI; H, *Hind*III; S, *Sal*I. (B) Nucleotide sequence of the *DFR1* gene and amino acid sequence of its putative translation product. Lower-case letters shows the amino acid sequence between the first and second methionines. The thick underline shows the putative signal peptide. Eleven potential N-glycosylation sites (N-X-S/T) are shaded. Conserved Cys residues of Ig-domain are circled. The acidic region is enclosed by an open box. The shaded box indicates the predicted transmembrane region. The tyrosine kinase catalytic sequence is enclosed by a polygon. The kinase insertion sequence is shown by a thin underline. Conserved Tyr residue in the C-terminal tail is indicated by a triangle. The putative polyadenylation signal is shown by a wavy line and truncated poly(A), by a dotted line. The region corresponding to the *dk1* sequence is labeled by a broken underline.

longer than counterparts in vertebrate FGF-Rs (14 amino acids). Except for the kinase insert, the overall sequence homology of the kinase domain between *DFR1* and vertebrate FGF-Rs was estimated as about 60%. Homologies with other types of vertebrate tyrosine kinases were approx-

imately 40%. The carboxyl terminal tail of *DFR1* includes a tripeptide sequence, Tyr-Leu-Asp, which may provide the tyrosine phosphorylation site supposedly required for binding of SH2 of phosphoinositide-specific phospholipaseC- (Mohammadi et al., 1991).

```

DFR1 Ig domains
II: DEELSLINHALDPEFH--ITPTINGTV- (13) -RHTLDYDQVAGAGCSPTVENVLGGCI
I: NRTGGMKIKYLSLZSK--KAPITVPTK- (16) -RQQLDFVNVKIQKQVITAEENLQAG

DFR2 Ig domains
V: CBYCHRNKIIDVTVENSFQRELSQMD- (22) -ATLLRZERAQSGNSKAGQIDSKRWYK
IV: QGKFOIAGLPPMDEKAGTRESKLELDTG- (32) -RSLITVQQLQPNVAKSTFQKLVVQQLDQ
III: GRTMSIDLLKDEALEPK-LTLEKQNA- (18) -PQVTEGQVLEKTPKQVQVFAKTVVGRY
II: GRTNIDAPVYVSPANLIF---PTKXIP- (12) -NNTLSEVATSEGSILNPTVQMAWQVY
I: NCRSEVNRKTVYSELKQKYS---KRVVLYK- (13) -STVLTFRNPTFDQKQKSLASSQVRS

Flg Ig domains
III: GSHSLERKLNIDVYVQ--LPTKLVVQ- (11) -GSEVTVGDSVQAGSGLSEFESSFNSD
II: ANTHPEKPSSESYNEI--LRLKNGTE- (16) -TSTLINDGTVFSGMDKLVVEMVYGSF
I: GRNIDAPVYVSPANLIF---PTKXIP- (12) -NNTLSEVATSEGSILNPTVQMAWQVY
    
```

Fig. 2. Amino acid sequence alignment of Ig-domains of *DFR1*, *DFR2* and human *flg* (Fig; Ruta et al., 1989) proteins. I-V, Ig-domains I-V (see Fig. 3). White letters in filled boxes indicate invariant amino acids, while shaded letters, conserved amino acids.

The extracellular domains of FGF-Rs are, in general, characterized by a series of Ig-domains, each containing two Cys residues, possibly connected by a disulfide bond, in an interval of several scores of residues capable of constituting  $\beta$ -sheet structures (Williams and Barclay, 1988). The consensus sequence for the Ig-domains is  $Vx(I/L)xC(8x-12x)W(20x-50x)DxGxYxC$  ( $x$ =arbitrary amino acid). As shown in Figs 2 and 3, the *DFR1* protein contains two Ig-domains. (Most vertebrate FGF-Rs have two or three Ig-domains (Lee et al., 1989; Ruta et al., 1989; Seno et al., 1991).) As in the case of vertebrate FGF-Rs, *DFR1* extracellular domains contain a short stretch of acidic amino acids (Fig. 3). Locations of two potential N-glycosylation sites were found conserved between *DFR1* and the *flg*, one of human FGF-Rs (Ruta et al., 1989).

Using a human FGF-R cDNA (Seno et al., 1991) as a probe, Southern blot analysis of the total genomic DNA of *Drosophila* was carried out. *DFR1*-derived fragments were found to be hybridized in all lanes under a less stringent condition (data not shown). From the above, the *DFR1* gene would appear quite likely to be a counterpart of vertebrate FGF-Rs in *Drosophila*.

**DFR2 is another type of FGF-R gene homologue encoding a polypeptide with five Ig-domains**

We next determined the nucleotide sequences of the cDNA insert in cFR5-1 and its relevant genomic regions. As schematically shown in Fig. 4A, the *DFR2* gene had an intron 85 bp long. The *DFR2* cDNA contained a single long ORF followed by 33 bp long, 3 non-coding sequence. Since neither possible signal peptide sequence nor probable translational initiation codon was found to be coded for by the cDNA, we sought to determine further 5 sequences using a *DFR2* genomic clone. Fig. 4B shows the composite nucleotide sequence thus obtained, which contains a 3159 bp long ORF following an in-frame termination codon of nucleotide positions, 121-123.

19 amino acids following the first methionine (amino acid positions, 2-20) may serve as a signal peptide, being highly hydrophobic. The second hydrophobic stretch, including 25 amino acids (amino acid positions, 601-625) may represent the transmembrane region, since it is followed by a putative tyrosine kinase sequence as described below.

As noted for *DFR1*, the intracellular region of *DFR2* con-

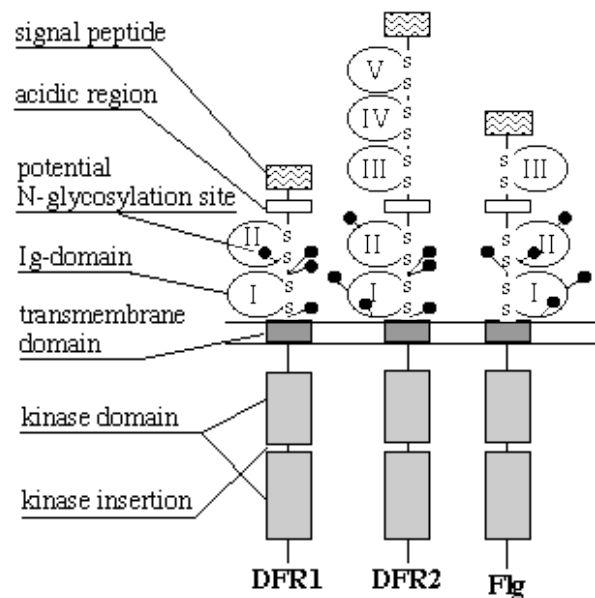

Fig. 3. Diagram showing structures of two *Drosophila* FGF-Rs and a human FGF-R, Flg. Only conserved N-glycosylation sites are indicated.

tained a split tyrosine kinase catalytic domain (Figs 3, 4B), highly homologous to those of vertebrate FGF-Rs. Homology between *DFR1* and *DFR2* kinase domains was 79%. The Tyr-Leu-Asp sequence was found near the carboxyl terminus of *DFR2*. The *DFR2* extracellular region included five Ig-domains, of which two were found in the region flanked by the acidic domain and transmembrane domain (Figs 2, 3). Three and four of nine N-glycosylation sites of *DFR2* were conserved in both *DFR1* and *flg*, respectively (Fig. 3).

*DFR2* is virtually identical in nucleotide sequence to *DFGF-R*, whose sequence has been reported by Glazer and Shilo (1991). However, their original *DFGF-R* sequence appears to include some defects in two regions. One base deletion in an C stretch of *DFGF-R* (nucleotide positions, 865-868 in Fig. 4B) disrupted the coding region for the extracellular domain. Nucleotide changes in the region from 2850 to 2892 (see Fig. 4B) results in loss of the invariant glutamic acid of subdomain VIII of *DFGF-R*.

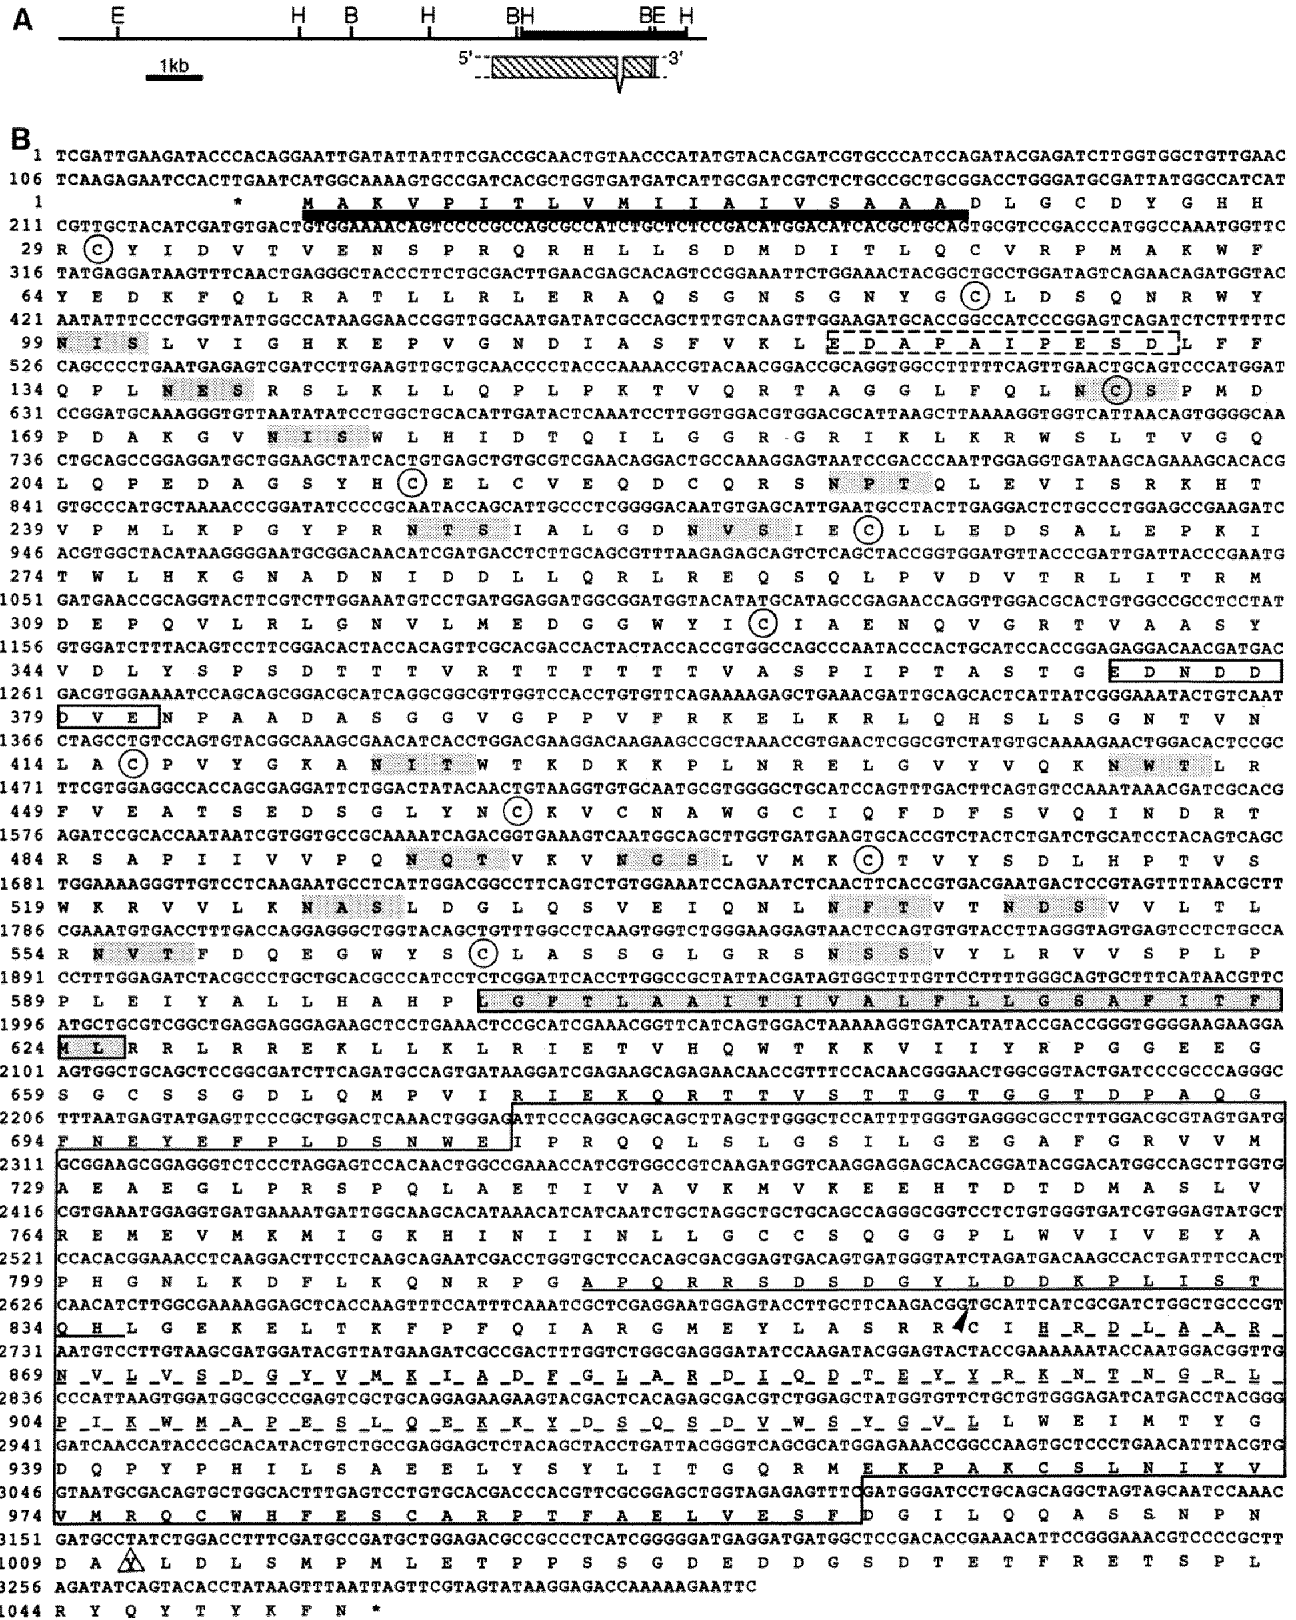

**Fig. 4.** (A) Restriction map of the *DFR2* genomic region and organization of the *DFR2* transcription unit. (B) Nucleotide sequence of the *DFR2* gene and amino acid sequence of its putative translation product. The arrowhead indicates the location of an 85 bp intron. All symbols and abbreviations are the same as in Fig. 1.

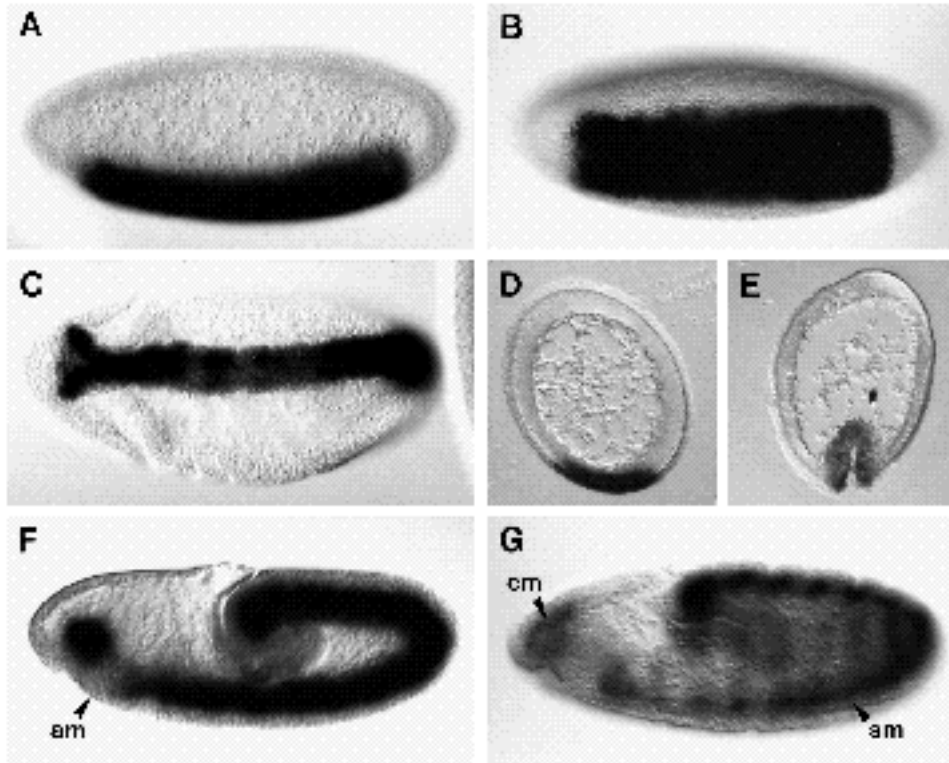

**Fig. 5.** *DFR1* RNA expression in early embryos. Spatial distribution of *DFR1* RNA was examined by in situ hybridization using digoxigenin-labeled RNA as a probe. (A,F,G, lateral views; B,C, ventral views. Anterior is the left and dorsal is up. D,E, transverse sections; dorsal side up). (A,B,D) Stage 5 embryos (cellular blastoderm). Note that *DFR1* is exclusively expressed in mesodermal primordium situated at the ventral side. (C,E) Stage 6-7 embryos. (F) Stage 8 embryo (germ-band extension). Only invaginated mesoderm appears to express *DFR1*. am, anterior midgut. (G) Stage 9 embryo (fully extended germ band). *DFR1* expression appears to segment. cm, cephalic mesoderm; sm, somatic mesoderm.

### Specific expression of *DFR1* in prospective mesoderm during early embryogenesis

The spatial and temporal expression of *DFR1* RNA was examined by in situ hybridization of whole embryos. The expression of *DFR1* RNA was first detected at the cellular blastoderm stage (stage 5; Campos-Ortega and Hartenstein, 1985), about 150 minutes following egg fertilization, just before the onset of gastrulation. The ventral surface of the embryo, 16-17 cells wide and from 10 to 85% egg length, was hybridized with the *DFR1* probe (Fig. 5A,B,D). This region of *DFR1*-expressing cells corresponds to mesodermal primordium, which eventually participates in the ventral furrow formation. Note that at stages 6-7 (about 3 hours after egg fertilization), all *DFR1*-expressing cells invaginated to form mesoderm (Fig. 5C,E). Fig. 5F shows the staining pattern of an embryo at stage 8 (3 hours 30 minutes; stage for germ-band extension). The anterior part of the *DFR1*-positive region appears to be separate from the main body in forming the cephalic mesoderm. This is most probably due to invagination of midgut primordium (see an arrowhead labeled am in Fig. 5F). At stage 9 (about 4 hours), the *DFR1*-positive region began to segment (Fig. 5G). These findings indicate the expression of *DFR1* to be mesoderm-specific at least in early embryos.

### *DFR1* expression in somatic mesoderm and other tissues

The invaginated mesodermal cells mainly differentiate into somatic and visceral muscles (Campos-Ortega and Hartenstein, 1985). *DFR1* expression in somatic mesoderm is described in the following.

*DFR1* expression dramatically changes at stage 11 (6-7

hours), when germ-band fully extends and intersegmental furrows become much more discernible. As shown in Fig. 6A, the overall expression of *DFR1* in the mesoderm is virtually extinct and, instead, a small number of cells strongly expressing *DFR1* emerge in the ventrolateral region of each segment. Since such *DFR1*-positive cells were found in all of 50 embryos derived from *AS-C<sup>-/+</sup>* parents, the *achaete-scute* gene products may not be required for their presence. Thus, these *DFR1*-positive cells are suggested not to be neural cells. During germ-band retraction (stage 12), isolated *DFR1*-positive cells increase in number and scatter in the entire region of the somatic mesoderm (Fig. 6B).

At late stage 12 (about 8 hours), three rows of *DFR1*-positive cells are distinguishable in bodywall (Fig. 6C). These cells appear to be precursor cells for ventral (v), pleural (p) or dorsal (d) groups of muscles. When the germ-band has completely retracted, cell fusions to produce the muscle pattern finish (Bate, 1991). As expected, at early stage 13 (9.5 hours), vs 2-4 (muscles 26,27,25; ventral group; Crossley, 1978) and pet 1-3 (muscles 21-23; pleural group) were clearly *DFR1*-positive (Fig. 6D). Thus, the majority of *DFR1*-positive cells appear to eventually differentiate into muscle.

*DFR1* expression also occurred in tissues other than somatic mesoderm. In the middle of stage 12, mid-ventral, *DFR1*-positive cells were detected (Fig. 6E). They may be ventral nerve cord cells, since their presence requires the *achaete-scute* gene products (Fig. 6F). *DFR1* expression in CNS persists at least until stage 16 (13 hours; Fig. 6H). Cells surrounding the hindgut and foregut were noted to be *DFR1*-positive at stage 12-13 (Fig. 6G).

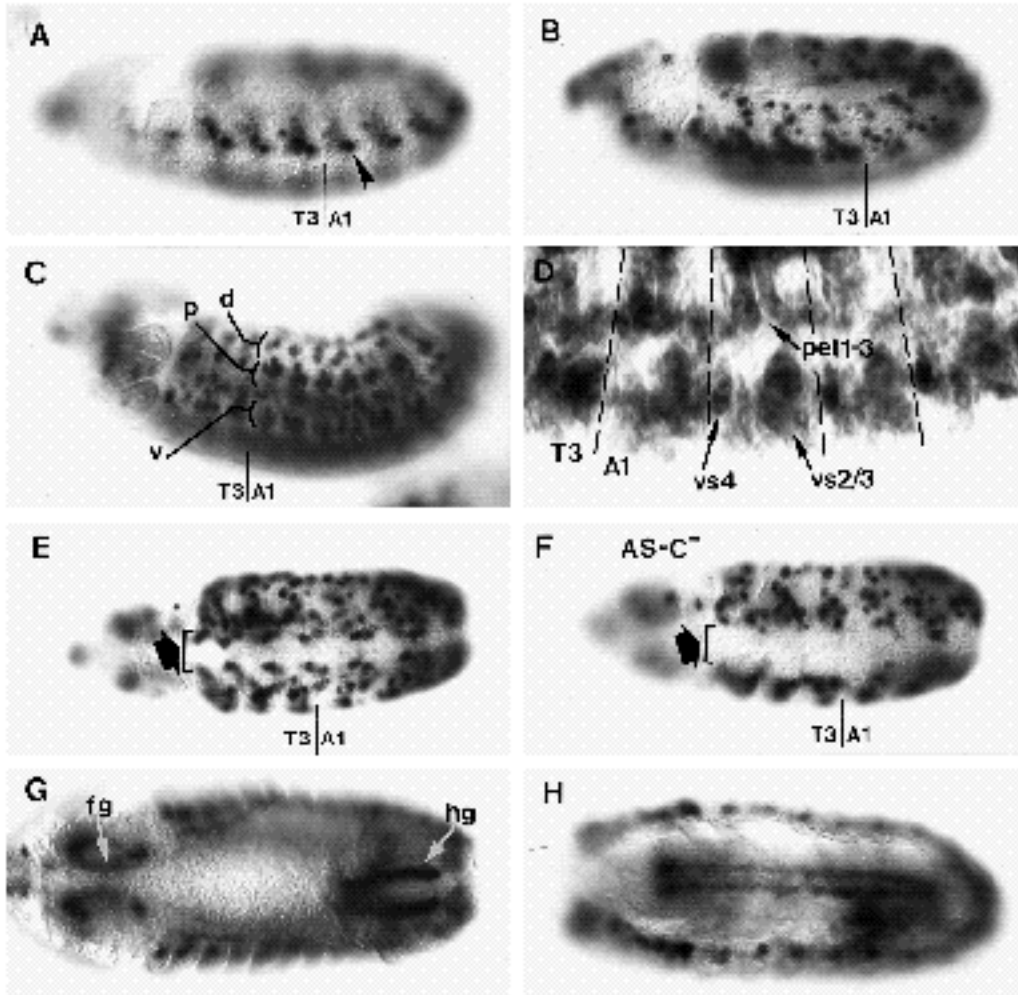

**Fig. 6.** *DFR1* expression in late embryos. (A-D) Ventrolateral views; (E,F,H,) ventral views; (G) a dorsal view. T3 and A1 denote the third thoracic and first abdominal segments, respectively. (A) Stage 11 embryo. The arrowhead shows a cluster of *DFR1*-positive cells. Note that strong *DFR1* expression occurs only in a small number of mesodermal cells situated in the ventrolateral region. (B) Early stage 12 embryo. The number of *DFR1*-positive cells, segmentally repeated, appears to increase. (C) Late stage 12 embryo. Dorsal (d), pleural (p) and ventral (v) groups of muscle precursors are discernible. (D) High magnification of ventrolateral region of early stage 13 embryo. The morphology of T3-A4 muscles belonging to ventral and pleural groups can be seen by the *DFR1* probe. The muscle nomenclature used here is that of Campos-Ortega and Hartenstein (1985). (E) Early stage 12 embryo. *DFR1* is

expressed in cells of ventral nerve cord, which is indicated by the arrow. (F) Early stage 12 *Df(1)260-1* embryo lacking the expression of the *achaete-scute* genes. As indicated by the arrow, the *DFR1* expression in the region corresponding to the ventral nerve cord is eliminated in the *AS-C<sup>-</sup>* embryos. (G) Late stage 12 wild-type embryo. *DFR1* is expressed in cells surrounding foregut (fg) and hindgut (hg). (H) Stage 16. *DFR1* RNA distribution can be detected along longitudinal connectives of CNS.

### ***DFR2* expression in invaginating endodermal and ectodermal cells**

The expression of *DFR2* RNA is first observed in primordia of anterior midgut and posterior midgut in the beginning of germ-band extension (stages 6-7, about 3 hours; Fig. 7A). This expression becomes much more prominent at stage 8 (about 3.5 hours), when anterior and posterior midguts invaginate as shown in Fig. 7B. Other expression patterns of *DFR2* RNA are essentially identical to those described by Glazer and Shilo in the case of *DFGF-R* (1991). At stages 8, *DFR2*-positive regions 1-2 cells wide become discernible (Fig. 7C). They appear to correspond to CNS midline cells and/or their precursors. At stage 10 (about 5 hours), cells contributing to tracheal pit formation begin to express *DFR2* RNA (Fig. 7D). At stage 13, *DFR2*-positive signal can also be observed in cells corresponding to the presumptive salivary duct and salivary tubes (data not shown). These observations suggest that *DFR2* is involved in the formation of the endodermal layer (midgut),

and development of mesectoderm and tubular organs derived from ectoderm.

### ***DFR1* expression in gastrulation-defective mutants, *twist* and *snail***

Embryos of null mutations in *twist* or *snail* fail to form a normal ventral furrow; and cannot form mesodermal cell layer (Nüsslein-Volhard et al., 1984; St. Johnston and Nüsslein-Volhard, 1992; Leptin, 1991). Examination was made of the distribution of *DFR1* RNA in *twist<sup>-</sup>* and *snail<sup>-</sup>* embryos. A quarter of progeny derived from either *twist<sup>+/+</sup>* or *snail<sup>+/+</sup>* parents was found negative to the *DFR1* probe (255 and 179 embryos were examined, respectively; Fig. 8A,B,D). The morphology of *DFR1*-negative embryos was abnormal, showing *twist<sup>-</sup>* or *snail<sup>-</sup>* phenotypes (Fig. 8B,D). Thus, concomitant expression of *twist* and *snail* gene products may be required for mesoderm-specific *DFR1* expression in early embryos. At later stages, a small number of *DFR1*-positive cells were detected in the ventral region

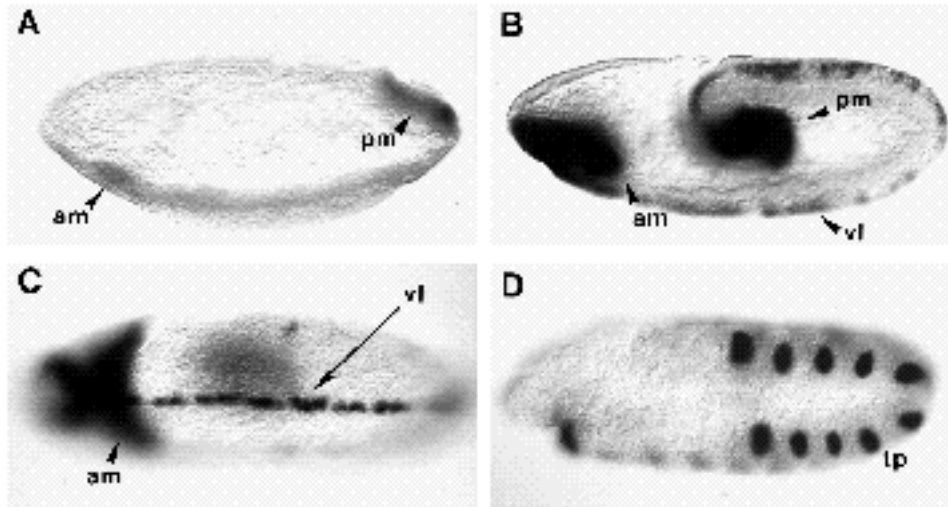

**Fig. 7.** *DFR2* expression in wild-type embryos. Whole embryos were hybridized with *DFR2* probe. (A,B,D) Lateral views; (C) a ventral view. (A) Stages 6-7 embryo. am, anterior midgut; pm, posterior midgut. (B,C) Stage 8 embryos. Note that *DFR2* is expressed in ventral midline (vl). (D) Stage 11 embryo. Tracheal pits (tp) are labeled with *DFR2* probe.

of *twist*<sup>-</sup> and *snail*<sup>-</sup> embryos (Fig. 8C,E). From their positions and size, these cells appeared to be neuronal cells.

#### ***DFR1* may be required not for gastrulation but for the formation of somatic mesoderm**

During in situ hybridization experiments, we noticed that the *DFR1* gene is located within a short deletion of *sr16* at the 90D-E region (De La Pompa et al., 1989; Bellen et al., 1992). This deletion was estimated to be 70-300 kb in length; it is known to include at least two genes *couch potato* (*cpo*) and *stripe* (*sr*). *cpo* is apparently unrelated to *DFR1* (Bellen et al., 1992). We first examined the gastrulation of 3-5 hour embryos derived from *sr16*<sup>+/+</sup> parents, by following *twist* RNA expression in presumptive mesoder-

mal cells (Thisse et al., 1988). No abnormal invagination was observed in more than 100 embryos at least until stage 8. Germ-band-extending embryos from the same parents were also hybridized with a mixture of *DFR1* and *DFR2* probes. *DFR1*<sup>-</sup>*DFR2*<sup>+</sup> embryos should correspond to those homozygous for *sr16*. As shown in Fig. 9A, *sr16*/*sr16* embryos were essentially normal in *DFR2* expression in midline cells. In contrast, aberrant *DFR2*-expression was observed in *twist*<sup>-</sup> embryos defective in gastrulation (Fig. 9B). Although we do not know possible morphological changes in 5- to 7-hour-old *DFR1*-defective embryos, it should thus be possible for normal gastrulation to occur without the *DFR1* gene product.

To examine the muscle formation in *sr16* embryos, we utilized P[Dmyd-lacZ], by which *Dmyd* expression can be

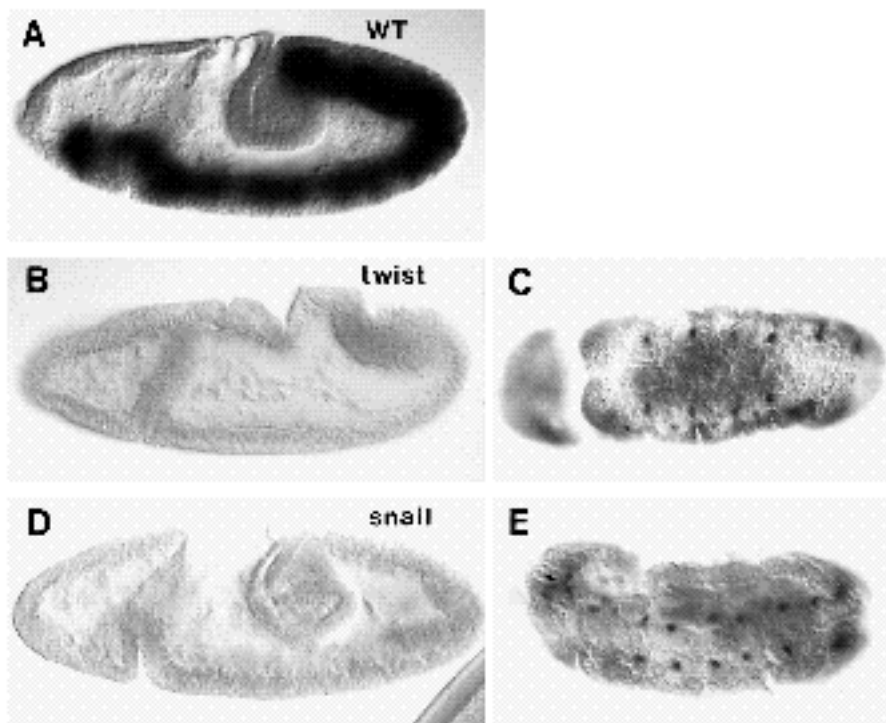

**Fig. 8.** *DFR1* expression pattern in gastrulation-defective mutant embryos. Embryos were hybridized with the *DFR1* probe. (A,B,D) Lateral views; (C,E) ventral views. (A) Wild-type embryo at stage 8 (3.5 hour). (B) Germ-band-extending *twi*<sup>ID96</sup> embryo. (C) Germ-band-retracting *twi*<sup>ID96</sup> embryo. (D) Germ-band-extending *sna*<sup>II</sup>G embryo. (E) Germ-band-retracting *sna*<sup>II</sup>G embryo. Note that, in *twist*<sup>-</sup> or *snail*<sup>-</sup> mutant embryos, *DFR1* is not expressed at early stages (B,D), but a small number of *DFR1*-expressing, presumably neural cells can be seen in ventral region at later stages (C, E).



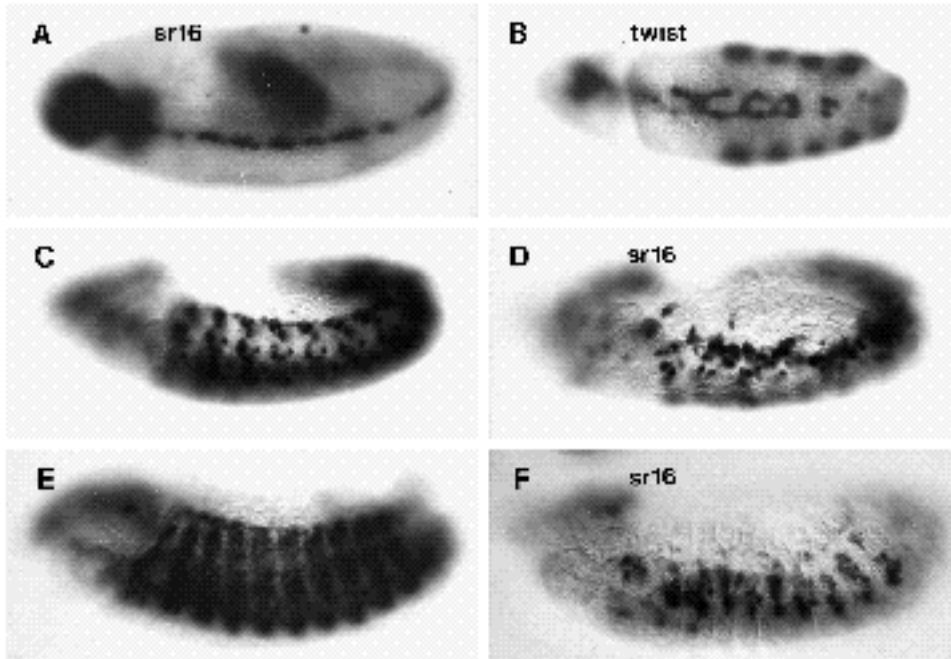

**Fig. 9.** Gastrulation and *Dmyd* expression in *sr16* mutant embryos lacking *DFR1* expression. (A,B) Ventral views; (C-F) lateral views. (A) Germ-band-extending *sr16* embryo hybridized with a mixture of *DFR1* and *DFR2* probes. No *DFR1* expression was observed. Normal *DFR2* expression in midline cells suggests that *DFR1* is not required for normal midline formation. (B) Germ-band-extending *twi<sup>DR96</sup>* embryo hybridized with the *DFR2* probe. Note the aberrant *DFR2* expression in midline cells. (C-F) Expression of *Dmyd-lacZ* fusion gene in wild-type embryos (C and E) and *sr16* embryos (D and F), determined by anti- $\beta$ -galactosidase antibody.

Wild-type patterns of muscle precursors at stage 12 (C) are destroyed in *sr16* embryo (D). At stage 13, the number of *Dmyd*-expressing cells is extensively reduced in *sr16* embryo, particularly in the dorsal region (compare E and F).

detected as *lacZ* gene expression (Paterson et al., 1991). *Dmyd*, also called *nautilus*, is a *Drosophila* homologue of the vertebrate *MyoD*-family genes, specifically expressed in a subset of muscle precursors (Michelson et al., 1990; Paterson et al., 1991). The effect of *sr16* on *Dmyd* expression was examined. At stages 12-13, the number of *Dmyd*-expressing cells was found extensively reduced, particularly, in the dorsal region (Fig. 9C-F). At later stages, reduction of muscle fiber content was evident under a microscope with Nomarski optics (data not shown). These results show *DFR1* possibly to be required for the formation or extension of muscle precursor cells.

## DISCUSSION

The *Drosophila* genome includes two homologues of mammalian FGF-R genes, *DFR1* and *DFR2*. Their expression dynamically changes during embryogenesis. At earlier stages, *DFR1* is expressed in mesodermal primordium, and *DFR2* in the primordia of the anterior and posterior midguts. At later stages, *DFR1* RNA is expressed in developing tissues derived from mesoderm and neuroectoderm, including muscle precursors and CNS. *DFR2* RNA appears to be expressed in those tissues derived from ectoderm and mesectoderm, including the trachea, salivary tubes and CNS.

### Structural and evolutionary relationship between *Drosophila* and vertebrate FGF-Rs

A comparison of the amino acid sequences of kinase domains indicated *DFR1* to have about 80% and 60% homology with *DFR2* and any member of vertebrate FGF-Rs, respectively. *DFR1* and *DFR2* genes may thus quite

possibly be derivatives of a common ancestral arthropod gene, diverging from an ancient vertebrate FGF-R gene at the time of the major phylogenetic branch leading to arthropods and chordates.

Extracellular regions of *Drosophila* and vertebrate FGF-Rs are much more diversified than kinase regions. *DFR1* and *DFR2* have two and five Ig-domains, respectively. (Most members of the vertebrate FGF-R family contain three Ig-domains, while the remaining have two.) *DFR1* and *DFR2* may recognize different ligands. Our sequence analysis showed the extracellular region flanked by the acidic region and transmembrane domain to be considerably conserved in both sequence and organization. In particular, some N-glycosylation sites were found invariant in position among *DFR1*, *DFR2* and *flg* protein. (see Fig. 3). This region may possibly be essential for common functions of the FGF-R family members.

### Possible roles of *DFR1* in mesoderm formation and subsequent differentiation of mesodermal cells

FGFs secreted by non-mesodermal cells may induce mesoderm formation in vertebrates (Jessell and Melton, 1992; Whitman and Melton, 1992) but, so far, nothing has been reported as to the possible involvement of FGF or FGF-like factors in mesoderm formation in *Drosophila*. Only the nuclear concentration of the *dorsal* protein is considered important in determining mesodermal fate in *Drosophila* (Roth et al., 1989; Thisse et al., 1991). Thus, our finding of specific expression of *DFR1* in mesodermal cells is of particular importance. Recent molecular-cloning experiments show that other mesodermal genes, which include *twist*, *snail* and *MyoD*, are also shared in common by *Drosophila* and vertebrates (St. Johnston and Nüsslein-Vol-

hard, 1992; Michelson et al., 1990; Paterson et al., 1991) and, thus, it is reasonable to consider that *Drosophila* and vertebrates share in common some essential mechanisms underlying mesoderm formation and/or subsequent differentiation of mesodermal cells.

Our results suggest that *DFRI* expression is not necessarily mandatory for ventral furrow formation. In its place, *DFRI* would rather appear required for patterning of muscle precursor cells (somatic mesoderm), since *DFRI* RNA is predominantly expressed in embryonic muscle precursor cells and its absence results in extensive reduction in the number of *Dmyd/nau*-expressing muscle precursor cells, particularly, in the dorsal region (see Fig. 9D,F). During the early stages of muscle formation, some muscle precursor cells migrate from the ventral to lateral or dorsal region so as to produce the muscle pattern (Dohrman et al., 1991). Although there is no direct evidence to date, muscle patterning is supposed to be specified by the underlying ectoderm (Bate, 1991). The above findings suggest the possible involvement of *DFRI* (and maybe its ligand) in cell migration during muscle formation.

The *stripe* gene included in the *sr16* deletion is required for the normal development of adult flight muscles and CNS (De La Pompa et al., 1989). Although, at present, the relation between *stripe* and *DFRI* at the molecular level is unknown, similarity in expression/(mutant phenotype) and chromosomal locus suggest that they are genes intimately related, if not identical, to each other.

### Possible involvement of FGF-receptors in CNS formation

In *Drosophila*, various members of an immunoglobulin superfamily are expressed in developing nervous system; they include *fasciclins*, *neuroglian*, receptor-type phosphatases and a *Drosophila* homologue of mammalian *trk* (Grenningloh et al., 1990; Yang et al., 1991; Tian et al., 1991; Pulido et al., 1992). Some are homologous in amino acid sequence to vertebrate neural cell adhesion molecules and proteins with Ig-domains may possibly essential for neural development. As seen in Fig. 7C, *DFR2* RNA is expressed in most midline cells, which probably play a key role in the formation of axon commissures. *DFRI* RNA expression may occur along a pair of longitudinal connectives (see Fig. 6H). Since neurotrophins and FGFs are possibly required for neural cell differentiation in vertebrates (Jessell and Melton, 1992), the above findings imply important functions of *DFRI* and *DFR2* proteins in CNS formation in *Drosophila*.

We thank C. Nüsslein-Volhard, W. J. Gehring, A. Ferrus and Y. Hotta for supplying *Drosophila* strains. We also thank K. Igarashi for human FGF-R cDNA clones, and M. Asano and K. Shiohara for discussion. This work was supported in part by grants from the Ministry of Education, Science and Culture of Japan.

### REFERENCES

Amaya, E., Musci, T. J. and Kirschner, M. W. (1991). Expression of a dominant negative mutant of the FGF receptor disrupts mesoderm formation in *Xenopus* embryo. *Cell* **66**, 257-270.

Bate, M. (1990). The embryonic development of larval muscles in *Drosophila*. *Development* **110**, 791-804.

Bellen, H. J., Vaessin, H., Bier, E., Kolodkin, A., D'Evelyn, D., Kooyer, S. and Yan, Y. N. (1992). The *Drosophila couch potato* gene: An essential gene required for normal adult behavior. *Genetics* **131**, 365-375.

Burgess, W. H. and Maciag, T. (1989). The heparin-binding (fibroblast) growth factor family of proteins. *Annu. Rev. Biochem.* **58**, 575-606.

Campos-Ortega, J. A. and Hartenstein, V. (1985). *The Embryonic Development of Drosophila melanogaster*. Berlin: Springer-Verlag.

Cavener, D. R. (1987). Comparison of the consensus sequence flanking translational start sites in *Drosophila* and vertebrates. *Nucleic Acids Res.* **15**, 1353-1361.

Cross, M. and Dexter, T. M. (1991). Growth factors in development, transformation, and tumorigenesis. *Cell* **64**, 271-280.

Crossley, A. C. S. (1978). The morphology and development of the *Drosophila* muscular system. In *The Genetics and Biology of Drosophila* (ed. M. Ashburner and T. R. F. Wright), vol. 2b. London: Academic Press.

De La Pompa, J. L., Garcia, J. R. and Ferrus, A. (1989). Genetic analysis of muscle development in *Drosophila melanogaster*. *Dev. Biol.* **131**, 439-454.

Dohrman, C., Azpiazu, N. and Frasch, M. (1990). A new *Drosophila* homeo box gene is expressed in mesodermal precursor cells of distinct muscles during embryogenesis. *Genes Dev.* **4**, 2098-2111.

Emori, Y., Shiba, T., Kanaya, S., Inouye, S., Yuki, S. and Saigo, K. (1985). The nucleotide sequences of *copia* and *copia*-related RNA in *Drosophila* virus-like particles. *Nature* **316**, 773-776.

Friesel, R. and Dawid, I. B. (1991). cDNA cloning and developmental expression of fibroblast growth factor receptors from *Xenopus laevis*. *Mol. Cell Biol.* **11**, 2481-2488.

Glazer, L. and Shilo, B. (1991). The *Drosophila* FGF-R homolog is expressed in the embryonic tracheal system and appears to be required for directed tracheal cell extension. *Genes Dev.* **5**, 697-705.

Gonzalez, F., Romani, S., Cubas, P., Modolell, J. and Campuzano, S. (1989). Molecular analysis of the *asense* gene, a member of the *achaete-scute* complex of *Drosophila melanogaster*, and its novel role in optic lobe development. *EMBO J.* **8**, 3553-3562.

Grenningloh, G., Bieber, A. J., Rehm, E. J., Snow, P. M., Traquina, T. N., Hortsch, M., Patel, N. H. and Goodman, C. S. (1990). Molecular genetics of neuronal recognition in *Drosophila*: Evolution and function of immunoglobulin superfamily cell adhesion molecules. *Cold Spring Harbor Symp. Quant. Biol.* **55**, 327-340.

Hanks, S. K., Quinn, A. M. and Hunter, T. (1988). The protein kinase family: conserved features and deduced phylogeny of the catalytic domains. *Science* **241**, 42-52.

Higashijima, S., Michiue, T., Emori, Y. and Saigo, K. (1992). Subtype determination of *Drosophila* embryonic external sensory organs by redundant homeo box genes *BarH1* and *BarH2*. *Genes Dev.* **6**, 1005-1018.

Jessell, T. M. and Melton, D. A. (1992). Diffusible factors in vertebrate embryonic induction. *Cell* **68**, 257-270.

Kimelman, D., Abraham, J. A., Haaparanta, T., Palisi, T. M. and Kirschner, M. W. (1988). The presence of fibroblast growth factor in the frog egg: its role as a natural mesoderm inducer. *Science* **242**, 1053-1056.

Kojima, T., Ishimaru, S., Higashijima, S., Takayama, E., Akimaru, H., Sone, M., Yasufumi, E. and Saigo, K. (1991). Identification of a different-type homeobox gene, *BarH1*, possibly causing *Bar (B)* and *Om(1D)* mutations in *Drosophila*. *Proc. Natl Acad. Sci. USA* **88**, 4343-4347.

Lee, P. L., Johnson, D. E., Cousens, L. S., Fried, V. A. and Williams, L. T. (1989). Purification and complementary DNA cloning of a receptor for basic fibroblast growth factor. *Science* **245**, 57-60.

Leptin, M. (1991). *twist* and *snail* as positive and negative regulators during *Drosophila* mesoderm development. *Genes Dev.* **5**, 1568-1576.

Michelson, A. M., Abmayr, S. M., Bate, M., Arias, A. M. and Maniatis, T. (1990). Expression of a *MyoD* family member prefigures muscle pattern in *Drosophila* embryos. *Genes Dev.* **4**, 2086-2097.

Mohammadi, M., Honegger, A. M., Rotin, D., Fischer, R., Bellot, F., Li, W., Dionne, C. A., Jaye, M., Rubinstein, M. and Schlessinger, J. (1991). A tyrosine-phosphorylated carboxy-terminal peptide of the fibroblast growth factor receptor (Fg) is a binding site for the SH2 domain of phospholipase C-1. *Mol. Cell Biol.* **11**, 5068-5078.

Nüsslein-Volhard, C., Wieschaus, E. and Kluding, J. (1984). Mutations affecting the pattern of the larval cuticle in *Drosophila melanogaster*. I.

- Zygotic loci on the second chromosome. *Wilhelm Roux's Arch. Dev. Biol.* **193**, 267-282.
- Paterson, B. M., Walldorf, U., Eldridge, J., Dubendorfer, A., Frasch, M. and Gehring, W. J.** (1991). The *Drosophila* homologue of vertebrate myogenic-determination genes encodes a transiently expressed nuclear protein marking primary myogenic cells. *Proc. Natl. Acad. Sci. USA* **88**, 3782-3786.
- Pulido, D., Campuzano, S., Toshiaki, K., Modolell, J. and Barbacid, M.** (1992). *Dtrk*, a *Drosophila* gene related to the *trk* family of neurotrophin receptors, encodes a novel class of neural cell adhesion molecule. *EMBO J.* **11**, 391-404.
- Ruta, M., Burgess, W., Givol, D., Epstein, J., Neiger, N., Kaplow, J., Crumley, G., Dionne, C., Jaye, M. and Schlessinger, J.** (1989). Receptor for acidic fibroblast growth factor is related to the tyrosine kinase encoded by the *fms*-like gene (FLG). *Proc. Natl. Acad. Sci. USA* **86**, 8722-8726.
- Roth, S., Stein, D. and Nüsslein-Volhard, C.** (1989). A gradient of nuclear localization of the dorsal protein determines dorsoventral pattern in the *Drosophila* embryo. *Cell* **59**, 1189-1202.
- Sambrook, J., Fritsh, E. F. and Maniatis, T.** (1989). *Molecular Cloning: A Laboratory Manual*. New York: Cold Spring Harbor Laboratory Press.
- Seno, M., Sasada, R., Watanabe, T., Ishimaru, K. and Igarashi, K.** (1991). Two cDNAs encoding novel human FGF receptor. *Biochim. Biophys. Acta.* **1089**, 244-246.
- Slack, J. M. W., Darlington, B. G., Heath, J. K. and Godsave, S. F.** (1987). Mesoderm induction in early *Xenopus* embryos by heparin-binding growth factors. *Nature* **326**, 197-198.
- Shishido, E., Emori, Y. and Saigo, K.** (1991). Identification of seven novel protein-tyrosine kinase genes of *Drosophila* by the polymerase chain reaction. *FEBS Lett.* **289**, 235-238.
- St.Johnston, D. and Nüsslein-Volhard, C.** (1992). The origin of pattern and polarity in the *Drosophila* embryo. *Cell* **68**, 201-219.
- Tautz, D. and Pfeifle, C.** (1989). A non-radioactive in situ hybridization method for the localization of specific RNAs in *Drosophila* embryos reveals translational control of the segmentation gene *hunchback*. *Chromosoma* **98**, 81-85.
- Thisse, B., Stoetzel, C., Gorostiza-Thisse, C. and Perrin-Schmitt, F.** (1988). Sequence of the *twist* gene and nuclear localization of its protein in endomesodermal cells of early *Drosophila* embryos. *EMBO J.* **7**, 2175-2183.
- Thisse, C., Perrin-Schmitt, F., Stoetzel, C. and Thisse, B.** (1991). Sequence-specific transactivation of the *Drosophila* *twist* gene by the dorsal gene product. *Cell* **65**, 1191-1201.
- Tian, S., Tsoulfas, P. and Zinn, K.** (1991). Three receptor-linked protein-tyrosine phosphatase are selectively expressed on central nervous system axons in the *Drosophila* embryo. *Cell* **67**, 675-685.
- von Heijne, G.** (1983). Patterns of amino acids near signal-sequence cleavage sites. *Eur. J. Biochem.* **133**, 17-21.
- Yang, X., Seow, K. T., Bahri, S. M., Oon, S. H. and Chia, W.** (1991). Two *Drosophila* receptor-like tyrosine phosphatase genes are expressed in a subset of developing axons and pioneer neurons in the embryonic CNS. *Cell* **67**, 661-673.
- Yokouchi, Y., Ohsugi, K., Sasaki, H. and Kuroiwa, A.** (1991). Chicken homeobox gene *Msx-1*: structure, expression in limb buds and effect of retinoic acid. *Development* **113**, 431-444.
- Wanaka, A., Milbrandt, J. and Johnson, E. M.** (1991). Expression of FGF receptor gene in rat development. *Development* **111**, 455-468.
- Whitman, M. and Melton, D.A.** (1992). Involvement of p21<sup>ras</sup> in *Xenopus* mesoderm induction. *Nature* **357**, 252-254.
- Williams, A. F. and Barclay, A. N.** (1988). The immunoglobulin superfamily—Domains for cell surface recognition. *Ann. Rev. Immunol.* **6**, 381-405.
- Williams, L. T.** (1988). Signal transduction by the platelet-derived growth factor receptor. *Science* **243**, 1564-1570.

(Accepted 26 October 1992)
